# Supplementary material for: Opposing and Complementary Topographic Connectivity Gradients Revealed by Quantitative Analysis of Canonical and Noncanonical Hippocampal CA1 Inputs
Source: PubMed Central journal article supplement (PMC5790753; doi:10.1523/eneuro.0322-17.2018), 2018-01-30
Supplement: sup_enu-eN-NWR-0322-17-s04.pdf [file sup_enu-eN-NWR-0322-17-s04.pdf]

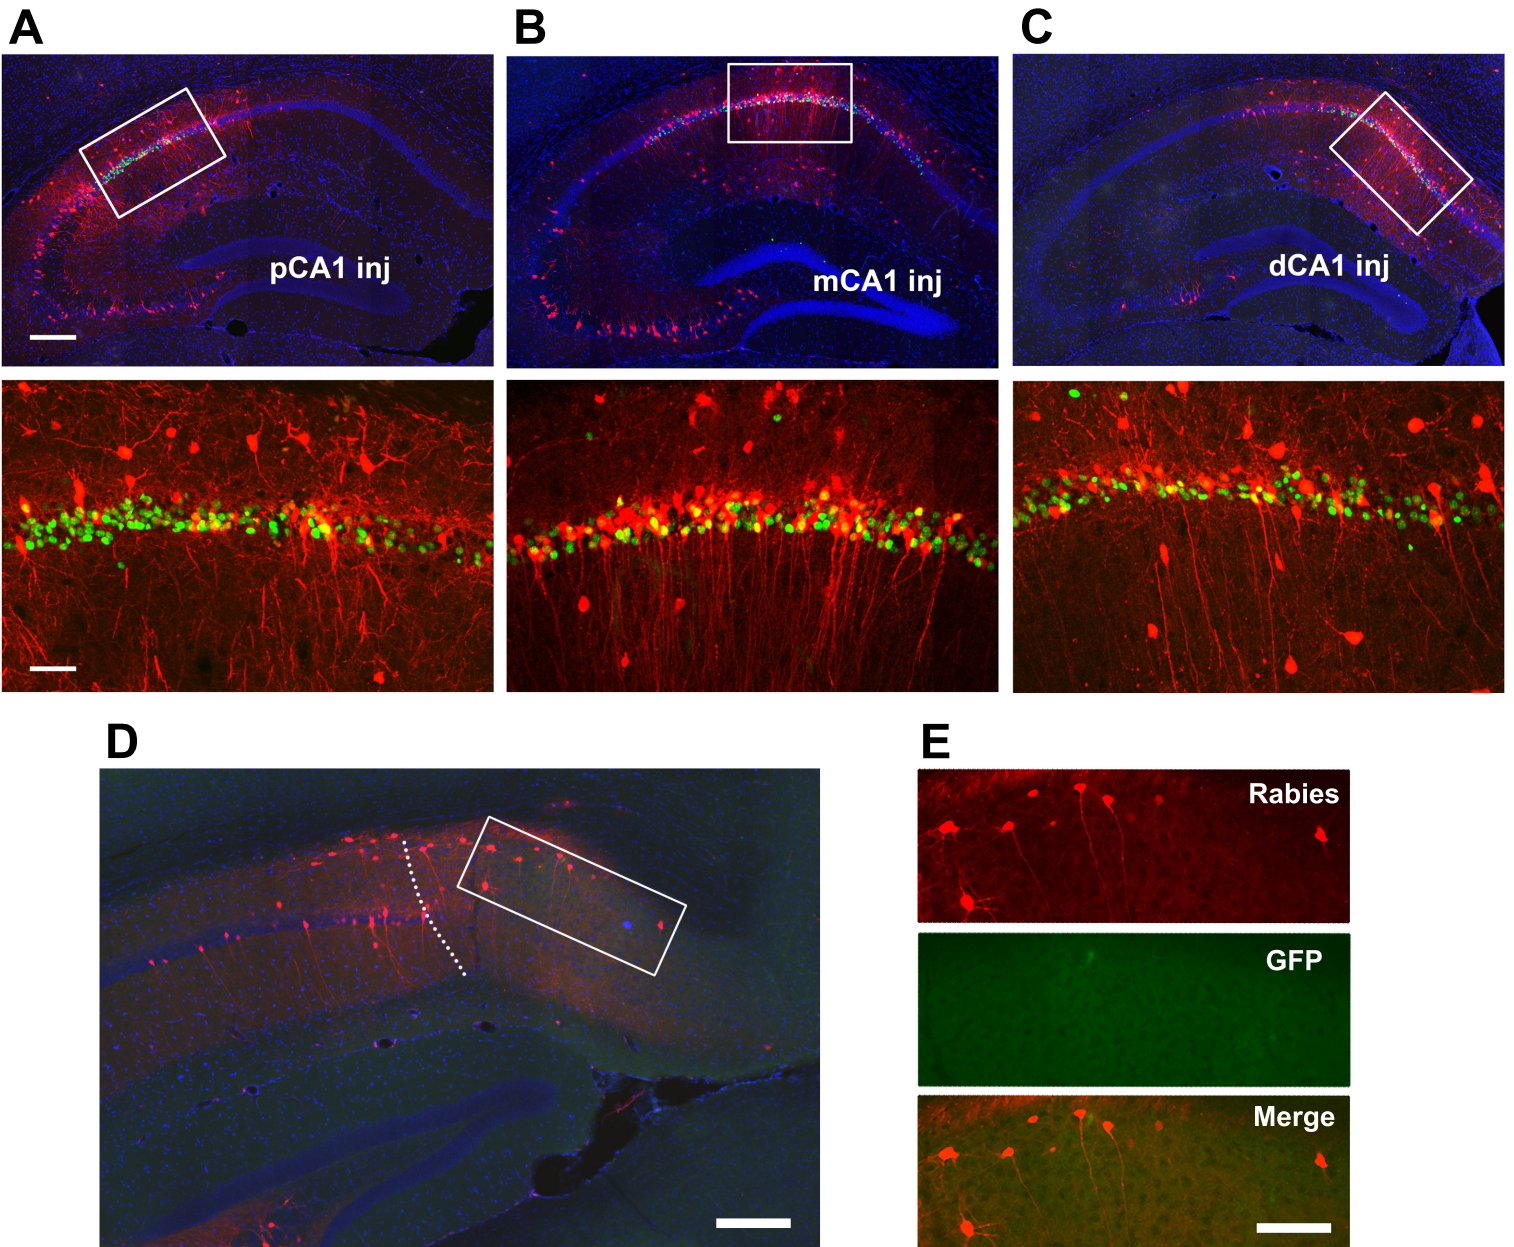

Figure 1-1
